# Supplementary material for: Metabolome and Transcriptome Integration Reveals Insights Into Flavor Formation of ‘Crimson’ Watermelon Flesh During Fruit Development
Source: Front Plant Sci. 2021 May 12;12:629361. doi: 10.3389/fpls.2021.629361 (PMC8153042; doi:10.3389/fpls.2021.629361)
Supplement: Supplementary Table 6 — The Pearson correlation coefficient between lipidS and genes. [file Table_6.xlsx]

## Sheet: Sheet1
gene	Metabolites	PCC
Cla97C06G118330	3-Nonen-1-ol, (Z)-	0.868
Cla97C06G118330	3,6-Nonadien-1-ol, (E,Z)-	0.935
Cla97C06G118330	2-Nonenal, (E)-	0.884
Cla97C06G118330	2,6-Nonadienal, (E,Z)-	0.808
Cla97C05G095170	3-Nonen-1-ol, (Z)-	0.97
Cla97C05G095170	3,6-Nonadien-1-ol, (E,Z)-	0.871
Cla97C05G095170	2-Nonenal, (E)-	0.911
Cla97C05G095170	2,6-Nonadienal, (E,Z)-	0.945
Cla97C05G089700	3-Nonen-1-ol, (Z)-	0.908
Cla97C05G089700	3,6-Nonadien-1-ol, (E,Z)-	0.805
Cla97C05G089700	2-Nonenal, (E)-	0.825
Cla97C05G089700	2,6-Nonadienal, (E,Z)-	0.859
Cla97C01G013600	3-Nonen-1-ol, (Z)-	0.939
Cla97C01G013600	3,6-Nonadien-1-ol, (E,Z)-	0.917
Cla97C01G013600	2-Nonenal, (E)-	0.967
Cla97C01G013600	2,6-Nonadienal, (E,Z)-	0.972
Cla97C01G001290	3-Nonen-1-ol, (Z)-	0.963
Cla97C01G001290	3,6-Nonadien-1-ol, (E,Z)-	0.903
Cla97C01G001290	2-Nonenal, (E)-	0.966
Cla97C01G001290	2,6-Nonadienal, (E,Z)-	0.977
